# Supplementary material
Source: PubMed Central journal article supplement (PMC8752085)
Supplement: NIHMS1764362-supplement-Supplemental_Data.pdf [file NIHMS1764362-supplement-Supplemental_Data.pdf]

Supplemental online content for:

## **Bone Metastases, Skeletal-Related Events, and Survival in Patients With Metastatic Non–Small Cell Lung Cancer Treated With Immune Checkpoint Inhibitors**

Angel Qin, MD; Songzhu Zhao, MSc; Abdul Miah, MD; Lai Wei, PhD; Sandipkumar Patel, MBBS; Andrew Johns, MD; Madison Grogan, BA; Erin M. Bertino, MD; Kai He, MD, PhD; Peter G. Shields, MD; Gregory P. Kalemkerian, MD; Shirish M. Gadgeel, MBBS; Nithya Ramnath, MBBS; Bryan J. Schneider, MD; Khaled A. Hassan, MD, MS; Nicholas Szerlip, MD; Zoey Chopra, BA; Sara Journey, BS; Jessica Waninger, BA, BS; Daniel Spakowicz, PhD; David P. Carbone, MD, PhD; Carolyn J. Presley, MD, MHS; Gregory A. Otterson, MD; Michael D. Green, MD, PhD; and Dwight H. Owen, MD, MSc

*J Natl Compr Canc Netw* 2021;19(8):915–921

**eTable 1:** Characteristics of Patients With mNSCLC Treated Using ICIs

**eTable 2:** Characteristics of Patients With mNSCLC Treated Using Chemotherapy Only

**eTable 1. Characteristics of Patients With mNSCLC Treated Using ICIs**

|                            | BM Absent<br>n (%) | BM Present<br>n (%) | Total<br>n (%)   | P Value |
|----------------------------|--------------------|---------------------|------------------|---------|
| Total, n                   | 206                | 124                 | 330              |         |
| Median age at ICI (IQR), y | 63.4 (57.6–72.7)   | 63.5 (56.8–71.2)    | 63.4 (57.3–71.7) | .646    |
| Sex                        |                    |                     |                  | .753    |
| Male                       | 96 (46.6)          | 60 (48.4)           | 156 (47.3)       |         |
| Female                     | 110 (53.4)         | 64 (51.6)           | 174 (52.7)       |         |
| Histology                  |                    |                     |                  | .490    |
| Adenocarcinoma             | 137 (66.5)         | 82 (66.1)           | 219 (66.4)       |         |
| Squamous                   | 56 (27.2)          | 30 (24.2)           | 86 (26.1)        |         |
| Other                      | 13 (6.3)           | 12 (9.7)            | 25 (7.6)         |         |
| KRAS mutation              |                    |                     |                  | .736    |
| 0                          | 153 (74.3)         | 90 (72.6)           | 243 (73.6)       |         |
| 1                          | 53 (25.7)          | 34 (27.4)           | 87 (26.4)        |         |
| EGFR mutation              |                    |                     |                  | .790    |
| 0                          | 200 (97.1)         | 121 (97.6)          | 321 (97.3)       |         |
| 1                          | 6 (2.9)            | 3 (2.4)             | 9 (2.7)          |         |
| TP53 mutation              |                    |                     |                  | .715    |
| 0                          | 163 (79.1)         | 96 (77.4)           | 259 (78.5)       |         |
| 1                          | 43 (20.9)          | 28 (22.6)           | 71 (21.5)        |         |
| ECOG PS                    |                    |                     |                  | .519    |
| Missing                    | 2                  | 2                   | 4                |         |
| 0                          | 39 (18.9)          | 18 (14.5)           | 57 (17.3)        |         |
| 1                          | 117 (56.8)         | 67 (54.0)           | 184 (55.8)       |         |
| 2                          | 44 (21.4)          | 34 (27.4)           | 78 (23.6)        |         |
| ≥3                         | 4 (1.9)            | 3 (2.4)             | 7 (2.1)          |         |
| Smoking status             |                    |                     |                  | .838    |
| Never                      | 25 (12.1)          | 16 (12.9)           | 41 (12.4)        |         |
| Current/Former             | 181 (87.9)         | 108 (87.1)          | 289 (87.6)       |         |
| Metastatic burden          |                    |                     |                  | <.001   |
| Missing                    | 0                  | 1                   | 1 (0.3)          |         |
| 1                          | 90 (43.7)          | 19 (15.5)           | 109 (33.1)       |         |
| 2                          | 76 (36.9)          | 47 (38.2)           | 123 (37.4)       |         |
| ≥3                         | 40 (19.4)          | 57 (46.3)           | 97 (29.5)        |         |
| PD-L1                      |                    |                     |                  | .262    |
| Missing                    | 143 (69.4)         | 91 (73.3)           | 234 (70.9)       |         |
| Negative                   | 16 (7.8)           | 12 (9.7)            | 28 (8.5)         |         |
| Positive                   | 47 (22.8)          | 21 (17.0)           | 68 (20.6)        |         |
| Line of therapy            |                    |                     |                  | .567    |
| 1                          | 57 (27.7)          | 34 (27.4)           | 91 (27.6)        |         |
| 2                          | 96 (46.6)          | 64 (51.6)           | 160 (48.5)       |         |
| 3                          | 53 (25.7)          | 26 (21.0)           | 79 (23.9)        |         |

Abbreviations: BM, bone metastases; ICI, immune checkpoint inhibitor; IQR, interquartile ratio; mNSCLC, metastatic non-small cell lung cancer; PS, performance status.

**eTable 2. Characteristics of Patients With mNSCLC Treated Using Chemotherapy Only**

| Characteristic         | n (%)       |
|------------------------|-------------|
| Total, N               | 166         |
| Age at therapy, y      | 66          |
| Sex                    |             |
| Male                   | 90 (54.2)   |
| Female                 | 76 (45.8)   |
| Smoking status         |             |
| Never                  | 25 (15.1)   |
| Current/Former         | 141 (84.9)  |
| Histology              |             |
| Adenocarcinoma         | 131 (78.9)  |
| Squamous               | 22 (13.3)   |
| Other                  | 13 (7.8)    |
| Stage at therapy       |             |
| IV                     | 166 (100.0) |
| Therapy                |             |
| Carboplatin/Pemetrexed | 49 (29.5)   |
| Gemcitabine            | 27 (16.3)   |
| Carboplatin/Paclitaxel | 13 (7.8)    |
| Pemetrexed             | 15 (9.0)    |
| EGFR inhibitors        | 15 (9.0)    |
| Other                  | 47 (28.3)   |

Abbreviation: mNSCLC, metastatic non–small cell lung cancer.
